# Supplementary material
Source: PubMed Central journal article supplement (PMC3032498)
Supplement: NIHMS264827-supplement-1.pdf [file NIHMS264827-supplement-1.pdf]

**Supplementary Table 1A.** Genes involved in the inflammatory/immune defense response of mice whose absolute difference exceeds 1.5-fold but with  $P > 0.05$ .

| Name                                                           | Symbol    | X     | P     |
|----------------------------------------------------------------|-----------|-------|-------|
| CD276 antigen (Cd276)                                          | Cd276     | 1.58  | 0.053 |
| Chemokine (C-C motif) ligand 17                                | Ccl17     | 1.67  | 0.061 |
| Chemokine (C-C motif) ligand 5                                 | Ccl5      | 1.63  | 0.172 |
| Chemokine (C-C motif) ligand 6                                 | Ccl6      | 3.29  | 0.085 |
| Chemokine (C-C motif) receptor 2                               | Ccr2      | 1.81  | 0.100 |
| Chemokine (C-C motif) receptor-like 1                          | Ccr1      | 2.28  | 0.134 |
| Chemokine (C-X3-C motif) ligand 1                              | Cx3cl1    | 1.67  | 0.133 |
| Chemokine (C-X-C motif) ligand 12, transcript variant 1        | Cxcl12    | -1.93 | 0.196 |
| Chemokine (C-X-C motif) ligand 16                              | Cxcl16    | 1.69  | 0.139 |
| Chemokine (C-X-C motif) ligand 7                               | Cxcl7     | 3.31  | 0.144 |
| Chemokine-like factor superfamily 2A                           | Cklfsf2a  | -1.72 | 0.238 |
| Cytokine receptor-like factor 1                                | Crif1     | 1.77  | 0.135 |
| Duffy blood group                                              | Dfy       | 2.16  | 0.062 |
| Fas (TNF receptor superfamily member)                          | Fas       | 2.13  | 0.056 |
| Interferon gamma inducible protein 47                          | Ifi47     | 1.53  | 0.179 |
| Interferon induced 203 protein                                 | Ifi203    | 1.92  | 0.096 |
| Interferon induced transmembrane protein 1                     | Ifitm1    | 1.77  | 0.146 |
| Interferon regulatory factor 1                                 | Irf1      | 1.54  | 0.128 |
| Interferon-related developmental regulator 1                   | Ifrd1     | 1.83  | 0.106 |
| Interleukin 1 beta                                             | Il1b      | 2.07  | 0.127 |
| Interleukin 1 receptor accessory protein, transcript variant 1 | Il1rap    | 1.97  | 0.067 |
| Interleukin 10 receptor, alpha                                 | Il10ra    | 1.64  | 0.083 |
| Interleukin 15 receptor, alpha chain, transcript variant 1     | Il15ra    | 1.73  | 0.102 |
| Interleukin 17 receptor                                        | Il17r     | 1.99  | 0.059 |
| Interleukin 17 receptor B                                      | Il17rb    | 2.01  | 0.064 |
| Interleukin 17 receptor E                                      | Il17re    | 3.53  | 0.224 |
| Interleukin 17E                                                | Il17e     | -1.85 | 0.354 |
| Interleukin 17F                                                | Il17f     | -1.50 | 0.428 |
| Interleukin 18 receptor 1                                      | Il18r1    | 2.31  | 0.097 |
| Interleukin 2 receptor, alpha chain                            | Il2ra     | 1.82  | 0.134 |
| Interleukin 31                                                 | Il31      | 1.58  | 0.179 |
| Interleukin 4 receptor, alpha, transcript variant 2            | Il4ra     | 2.15  | 0.066 |
| Lymphocyte antigen 86                                          | Ly86      | 1.56  | 0.092 |
| Peroxisome proliferator activated receptor gamma               | Pparg     | 2.06  | 0.143 |
| Replication initiator 1                                        | Repin1    | 1.72  | 0.095 |
| Toll-like receptor 3                                           | Tlr3      | 1.79  | 0.052 |
| Tumor necrosis factor (ligand) superfamily, member 13          | Tnfsf13   | 1.94  | 0.074 |
| Tumor necrosis factor (ligand) superfamily, member 15          | Tnfsf15   | -1.56 | 0.348 |
| Tumor necrosis factor receptor superfamily, member 23          | Tnfrsf23  | 1.57  | 0.137 |
| Tumor necrosis factor, alpha-induced protein 2                 | Tnfaip2   | 1.60  | 0.052 |
| Tumor necrosis factor, alpha-induced protein 8-like 2          | Tnfaip8l2 | 1.86  | 0.140 |
| Uveal autoantigen with coiled-coil domains and ankyrin repeats | Uaca      | 1.58  | 0.074 |

X = fold difference (negative values indicate down-regulation of the transcript). The Student heteroscedastic *t*-test was used for the comparison of myocardial infarction with control.

**Supplementary Table 1B.** Non-regulated genes involved in the inflammatory/immune defense response of mice.

| Name                                                                    | Symbol   | X     | P     | Name                                                          | Symbol    | X     | P     |
|-------------------------------------------------------------------------|----------|-------|-------|---------------------------------------------------------------|-----------|-------|-------|
| Allograft inflammatory factor 1                                         | Aif1     | 1.36  | 0.152 | Interferon, alpha-inducible protein                           | G1p2      | -1.17 | 0.518 |
| Arachidonate 5-lipoxygenase                                             | Alox5    | 1.28  | 0.494 | Interferon, alpha-inducible protein 27                        | lfi27     | -1.07 | 0.750 |
| Attractin                                                               | Atrn     | -1.11 | 0.475 | Interferon-activatable protein 203                            | N/A       | 1.08  | 0.715 |
| CD180antigen                                                            | Cd180    | 1.18  | 0.252 | Interferon-induced protein 44                                 | lfi44     | -1.21 | 0.431 |
| Chemokine ligand 12                                                     | Ccl12    | -1.07 | 0.803 | Interferon-induced protein with tetratricopeptide repeats 1   | lfit1     | 1.04  | 0.868 |
| Chemokine ligand 2                                                      | Ccl2     | 1.03  | 0.882 | Interferon-induced protein with tetratricopeptide repeats 2   | lfit2     | 1.28  | 0.332 |
| Chemokine ligand 22                                                     | Ccl22    | -1.13 | 0.715 | Interferon-induced protein with tetratricopeptide repeats 3   | lfit3     | -1.02 | 0.862 |
| Chemokine ligand 24                                                     | Ccl24    | 1.09  | 0.678 | Interferon-lambda2                                            | lfnl2     | -1.46 | 0.047 |
| Chemokine ligand 25                                                     | Ccl25    | 1.25  | 0.126 | Interferon-related developmental regulator 2                  | lfrd2     | 1.21  | 0.312 |
| Chemokine ligand 3                                                      | Ccl3     | 1.03  | 0.959 | Interleukin 1 receptor-like 1, transcript variant 1           | l1r1      | 1.30  | 0.329 |
| Chemokine receptor 5                                                    | Ccr5     | 1.31  | 0.163 | Interleukin 10                                                | l10       | 1.18  | 0.720 |
| Chemokine receptor-like 2                                               | Ccr12    | 1.10  | 0.639 | Interleukin 10 receptor, beta                                 | l10rb     | 1.34  | 0.211 |
| Chemokine ligand 1                                                      | Cxcl1    | 1.42  | 0.282 | Interleukin 12b                                               | l12b      | 1.24  | 0.507 |
| Chemokine ligand 4                                                      | Cxcl4    | 1.30  | 0.252 | Interleukin 15                                                | l15       | 1.23  | 0.239 |
| Chemokine ligand 9                                                      | Cxcl9    | 1.00  | 0.990 | Interleukin 16                                                | l16       | 1.49  | 0.048 |
| Chemokine receptor 4                                                    | Cxcr4    | 1.49  | 0.079 | Interleukin 17                                                | l17       | 1.14  | 0.720 |
| Chemokine receptor 6                                                    | Cxcr6    | -1.42 | 0.407 | Interleukin 17 receptor c                                     | l17rc     | 1.50  | 0.015 |
| Chemokine binding protein 2                                             | Ccbp2    | 1.29  | 0.272 | Interleukin 17 receptor d                                     | l17rd     | 1.13  | 0.704 |
| Chemokine-like factor 5, complete cds                                   | CKLF5    | 1.02  | 0.915 | Interleukin 17d                                               | l17d      | 1.02  | 0.851 |
| Chemokine-like factor superfamily 2B                                    | Ck1fsf2b | 1.31  | 0.170 | Interleukin 18                                                | l18       | 1.46  | 0.124 |
| Chemokine-like factor superfamily 3                                     | Ck1fsf3  | 1.31  | 0.066 | Interleukin 18 binding protein                                | l18bp     | 1.36  | 0.171 |
| Chemokine-like factor superfamily 4                                     | Ck1fsf4  | 1.22  | 0.292 | Interleukin 21                                                | N/A       | 1.28  | 0.391 |
| Chemokine-like factor superfamily 5                                     | Ck1fsf5  | -1.28 | 0.577 | Interleukin 21 receptor                                       | l21r      | 1.20  | 0.549 |
| Chemokine-like factor superfamily 6                                     | Ck1fsf6  | 1.49  | 0.072 | Interleukin 4 induced 1                                       | l4i1      | -1.45 | 0.217 |
| Chemokine-like factor superfamily 7                                     | Ck1fsf7  | 1.19  | 0.018 | Interleukin 6 receptor, alpha                                 | l6ra      | 1.46  | 0.220 |
| Chemokine-like factor superfamily 8                                     | Ck1fsf8  | -1.01 | 0.924 | Interleukin 7                                                 | l7        | 1.29  | 0.174 |
| Chemokine-like factor, transcript variant 1                             | Cklf     | 1.22  | 0.305 | Interleukin 7 receptor                                        | l7r       | -1.50 | 0.724 |
| Chitinase 3-like 4                                                      | Chi3l4   | 1.06  | 0.808 | Interleukin enhancer binding factor 3                         | l3        | 1.36  | 0.134 |
| Cytokine induced apoptosis inhibitor 1                                  | Ciapin1  | 1.25  | 0.231 | Interleukin-1 receptor associated kinase 1 splice form 1      | l1rak1    | 1.37  | 0.055 |
| Cytokine inducible SH2-containing protein                               | Cish     | -1.02 | 0.921 | Interleukin-1 receptor-associated kinase 1 binding protein 1  | l1rak1bp1 | 1.06  | 0.830 |
| Cytokine-like 1                                                         | Cyt1     | 1.37  | 0.039 | Myeloid differentiation primary response gene 88              | Myd88     | -1.01 | 0.916 |
| Cytokine receptor-like factor 3                                         | Crif3    | 1.21  | 0.521 | Pyd and card domain containing                                | Pycard    | -1.04 | 0.806 |
| Endothelial differentiation, sphingolipid G-protein-coupled receptor, 3 | Edg3     | 1.49  | 0.175 | Regenerating islet-derived 3 gamma                            | Reg3g     | 1.33  | 0.299 |
| Hemolytic complement                                                    | Hc       | 1.14  | 0.558 | Signal transducer and activator of transcription 5b           | Stat5b    | 1.21  | 0.385 |
| Interferon receptor 2                                                   | lfnar2   | 1.20  | 0.347 | Tachykinin 1                                                  | Tac1      | 1.08  | 0.839 |
| Interferon-activated gene 203                                           | lfi203   | 1.17  | 0.195 | Toll-like receptor 1                                          | Tlr1      | -1.31 | 0.316 |
| Interferon alpha responsive gene                                        | lfrg15   | 1.25  | 0.487 | Toll-like receptor 9                                          | Tlr9      | 1.32  | 0.096 |
| Interferon-dependent positive acting transcription factor 3 gamma       | lsgf3g   | -1.22 | 0.821 | Transforming growth factor, beta 1                            | Tgfb1     | 1.35  | 0.062 |
| Interferon gamma-induced gtpase                                         | lgtp     | 1.20  | 0.292 | Tumor necrosis factor superfamily, member 12                  | Tnfsf12   | 1.43  | 0.099 |
| Interferon gamma-inducible protein 30                                   | lfi30    | 1.18  | 0.517 | Tumor necrosis factor superfamily, member 13b                 | Tnfsf13b  | 1.32  | 0.385 |
| Interferon-induced transmembrane protein 2                              | lfitm2   | 1.29  | 0.051 | Tumor necrosis factor superfamily, member 9                   | Tnfsf9    | 1.38  | 0.353 |
| Interferon-induced transmembrane protein 3                              | lfitm3   | -1.12 | 0.301 | Tumor necrosis factor receptor superfamily, member 19         | Tnfrsf19  | 1.24  | 0.191 |
| Interferon-inducible gtpase 2                                           | liip2    | 1.32  | 0.123 | Tumor necrosis factor receptor superfamily, member 21         | Tnfrsf21  | 1.29  | 0.392 |
| Interferon-inducible gtpase family member 5                             | liip5    | -1.02 | 0.936 | Tumor necrosis factor receptor superfamily, member 4          | Tnfrsf4   | 1.02  | 0.914 |
| Interferon regulatory factor 2                                          | lrf2     | 1.31  | 0.219 | Tumor necrosis factor receptor superfamily, member 5          | Tnfrsf5   | 1.28  | 0.035 |
| Interferon regulatory factor 2 binding protein 1                        | lrf2bp1  | 1.01  | 0.956 | Tumor necrosis factor receptor superfamily, member 9          | Tnfrsf9   | -1.11 | 0.724 |
| Interferon regulatory factor 2 binding protein 2                        | lrf2bp2  | 1.12  | 0.682 | Tumor necrosis factor superfamily, member 5-induced protein 1 | Tnfsf5ip1 | 1.26  | 0.155 |
| Interferon regulatory factor 5                                          | lrf5     | 1.35  | 0.194 | Tumor necrosis factor, alpha-induced protein 1                | Tnfaip1   | 1.31  | 0.037 |
| Interferon regulatory factor 6, transcript variant 1                    | lrf6     | -1.14 | 0.732 | Tumor necrosis factor, alpha-induced protein 3                | Tnfaip3   | 1.43  | 0.152 |
| Interferon regulatory factor 7                                          | lrf7     | -1.03 | 0.875 | Tumor necrosis factor, alpha-induced protein 8                | Tnfaip8   | 1.19  | 0.197 |
| Interferon stimulated exonuclease gene 20-like 1                        | lsg20l1  | 1.22  | 0.414 | Tumor necrosis factor, alpha-induced protein 8-like 1         | Tnfaip8l1 | 1.19  | 0.409 |

X = fold difference (negative values indicate down-regulation of the transcript). The Student heteroscedastic *t*-test was used for the comparison of heart failure with control.
